# Supplementary material
Source: PubMed Central journal article supplement (PMC5544944)
Supplement: NIHMS882414-supplement-supplement_1.pdf [file NIHMS882414-supplement-supplement_1.pdf]

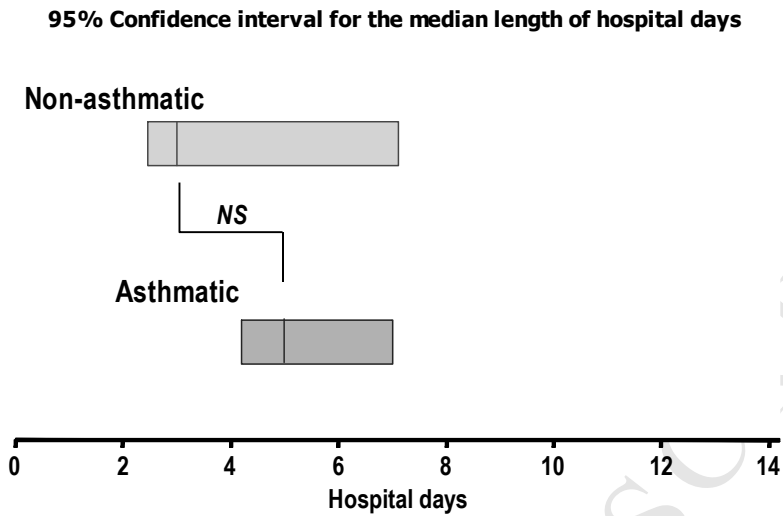

**Figure 2 Mean duration of hospitalization in children with HMPV infection.** Bars represent the 95% confidence interval for the median length of admission (hospital days) in children with and without history of severe prematurity (Panel A) or asthma (Panel B). p-values obtained by non-parametric Mann-Whitney test contrasting median hospital days in the two groups presented.

**Table E1 (supplemental)**

**Respiratory Distress Score**

| Score | Respiratory Rate | Supplemental O2 | Wheezing | Retractions |
|-------|------------------|-----------------|----------|-------------|
| 0     | <30              | None            | None     | None        |
| 1     | 30-45            |                 |          |             |
| 2     | 46-60            | Required        |          | (+)         |
| 3     | >60              |                 | (+)      |             |

**Table E1 Clinical severity score in children with HMPV infection.** Clinical parameters of the respiratory distress severity score (0-10) that includes need for supplemental O<sub>2</sub>, stratified tachypnea, wheezing and retractions.

ACCEPTED MANUSCRIPT
